# Supplementary material for: SUMOylation Regulates TDP-43 Splicing Activity and Nucleocytoplasmic Distribution
Source: PubMed Central journal article supplement (PMC8599232; doi:10.1007/s12035-021-02505-8), 2021-08-14
Supplement: 12035_2021_2505_MOESM1_ESM.pdf [file 12035_2021_2505_MOESM1_ESM.pdf]

## SUPPLEMENTARY DATA

### Supplementary Figure 1

**A**

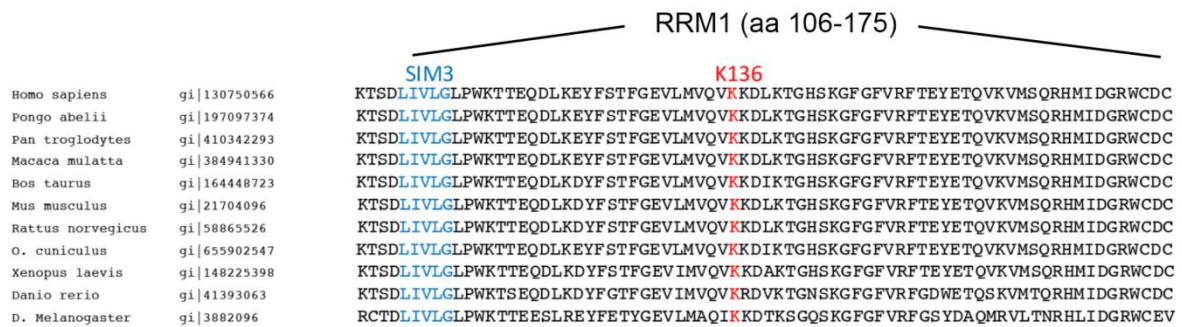

**B**

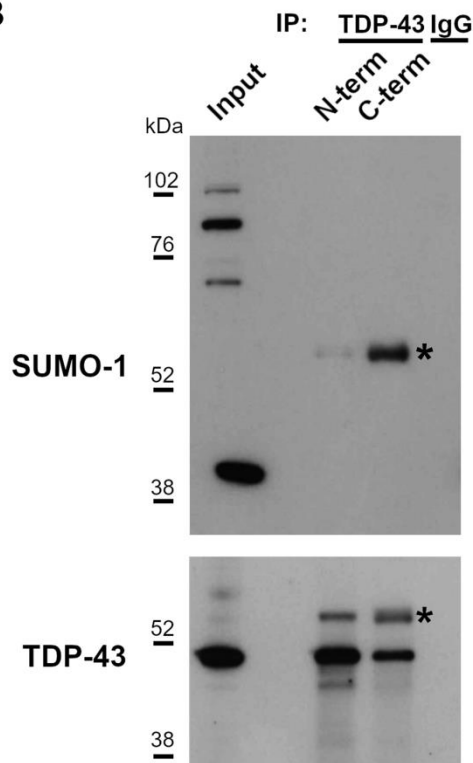

**C**

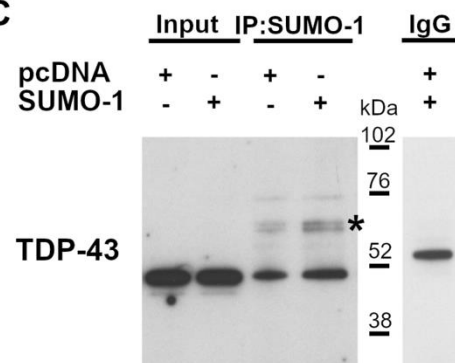

**TDP-43 SUMOylation in HEK 293T cells.** **A)** Phylogenetic analysis of the TDP-43 RRM1 sequence containing both the Lys 136 and the SIM3, as predicted by the *in silico* analyses. **B)** Representative WB images of immunoprecipitation (IP) assay on HEK 293T cell lysates treated with NEM to preserve protein SUMOylation. Anti-TDP-43 antibodies recognizing the N-term or C-term domain were used for IP. IgG antibody was used as negative control. **C)** Representative WB image of IP assay on HEK 293T cell lysates transfected with SUMO-1 or mock (pcDNA) constructs as indicated. Anti-SUMO-1 and IgG antibodies were used for IP. Asterisk, SUMOylated TDP-43 protein.

## Supplementary Figure 2

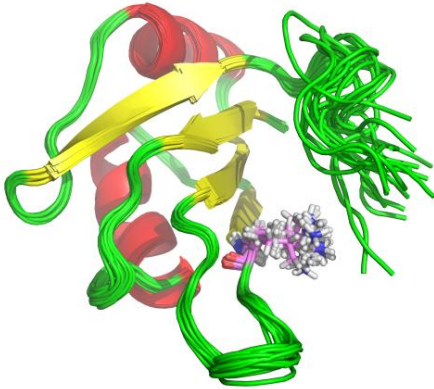

**Conformational flexibility of Lys 136.** The 20-lowest energy conformers making the NMR ensemble of TDP-43 RRM1 (PDB ID: 2c9g) is shown in red (helices), yellow (strands) and green (loops and disordered segments). K136 is depicted in stick representation (violet), highlighting that it both is not tied down to a specific conformation and remains flexible.

## Supplementary Figure 3

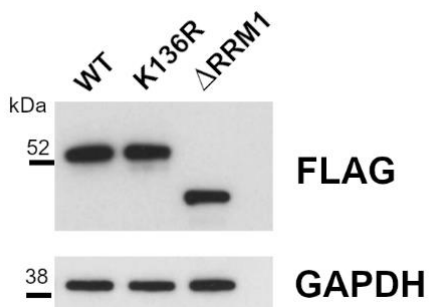

**Expression of exogenous TDP-43 proteins upon transfection of HEK 293T cells.** WB images showing the expression of the Flag-TDP-43 WT, K136R and  $\Delta$ RRM1 proteins in HEK 293T cells after transfection. These protein lysates were used in the UV-CLIP assays showed in Figure 2.

## Supplementary Figure 4

**A**

| SUMO prediction site (NOVA-1) |       |           |          |
|-------------------------------|-------|-----------|----------|
| Lysine                        | JASSA | SUMO-plot | GPS-SUMO |
| 59                            | no    | low       | medium   |
| 100                           | no    | high      | low      |
| 162                           | no    | high      | medium   |
| 198                           | no    | high      | low      |
| 219                           | no    | high      | high     |
| 453                           | no    | high      | low      |
| 474                           | low   | low       | medium   |
| 519                           | no    | low       | high     |

| SIM prediction motif (NOVA-1) |                 |        |          |
|-------------------------------|-----------------|--------|----------|
| aa position                   | SIM sequence    | JASSA  | GPS-SUMO |
| 105-109                       | ...QTIVQLQKE... | medium | medium   |
| 132-136                       | ...ERVCLIQGT..  | no     | medium   |
| 166-170                       | ...EPVSILQPQ... | medium | medium   |
| 185-189                       | ...AKLIVPNST... | no     | medium   |
| 194-198                       | ...AGLIIGKGG... | no     | medium   |
| 229-233                       | ...ERVVTISGE... | no     | high     |
| 437-441                       | ...KDVEIAPV...  | medium | high     |

**B**

| SUMO prediction site (hnRNPA2B1) |       |           |          |
|----------------------------------|-------|-----------|----------|
| Lysine                           | JASSA | SUMO-plot | GPS-SUMO |
| 110                              | no    | no        | medium   |

| SIM prediction motif (hnRNPA2B1) |                 |       |          |
|----------------------------------|-----------------|-------|----------|
| aa position                      | SIM sequence    | JASSA | GPS-SUMO |
| 60-64                            | ...SVLDRVLQE... | no    | medium   |

**C**

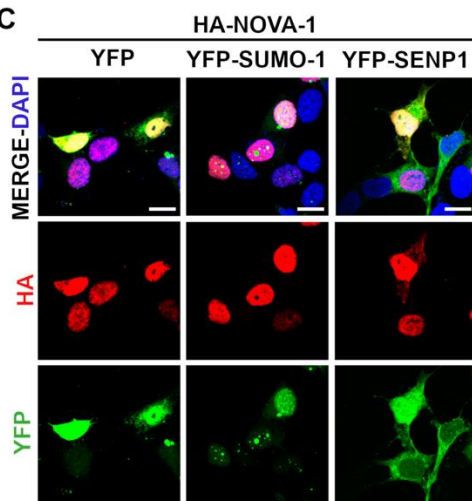

**D**

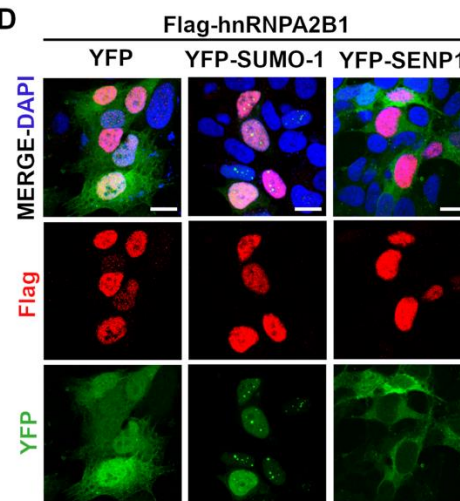

**E**

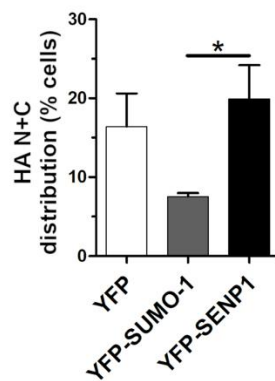

**F**

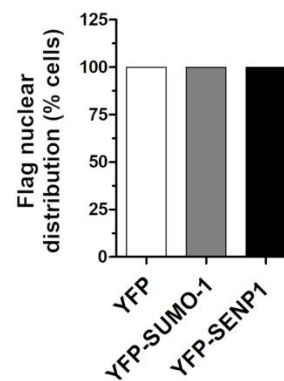

**Modulation of SUMOylation and nucleo-cytoplasmic distribution of NOVA-1 and hnRNPA2B1.** **A-B)** Prediction analyses of the putative SUMOylation sites (*left tables*) and SIM (*right tables*) of NOVA-1 (**A**) and hnRNPA2B1 (**B**) by using the indicated bioinformatic tools. **C,D)** Immunofluorescence images showing the sub-cellular distribution of HA-NOVA-1 (**C**) and Flag-hnRNPA2B1 (**D**) proteins in SK-N-BE cells upon YFP-SUMO-1 and YFP-SEN1 overexpression. DAPI was used for nuclei staining. Scale bar 10 $\mu$ m. **E,F)** Statistical analyses of both nuclear and cytoplasmic (N+C) distribution of HA-NOVA-1 (**E**) and of the nuclear distribution of Flag-hnRNPA2B1 (**F**) upon mock (YFP), YFP-SUMO-1 and YFP-SEN1 transfection (mean  $\pm$  s.e.m.; n  $\geq$  3 independent experiments; at least 100 cells analysed per condition; One-way ANOVA and Tukey post hoc test; \*p < 0.05).

## Supplementary Table 1.

List of primary and secondary antibodies used in Immunoprecipitation (IP), Immunofluorescence (IF) and Western Blot (WB) assays. Dilution conditions for WB and IF are indicated.

| Antibody                                       | Source                  | Assay    |
|------------------------------------------------|-------------------------|----------|
| TDP-43 N-ter (1:1000/1:500)                    | Protein Tech_10782-2-AP | WB/IF/IP |
| TDP-43 C-ter                                   | Protein Tech_12892-1-AP | IP       |
| SUMO-1 (1:1000)                                | Santa Cruz_sc-5308      | WB       |
| SUMO-1 (1:50)                                  | Cell Signaling_#4940    | IF/IP    |
| FLAG-Peroxidase (HRP) (1:1000)                 | Sigma-Aldrich_A8592     | WB       |
| Flag (1:2000)                                  | Sigma-Aldrich_F1804     | IF/IP    |
| GFP (1:1000)                                   | Protein Tech_50430-2-AP | WB       |
| $\alpha$ Tubulin (1:500)                       | Santa Cruz_sc-8035      | WB       |
| H3 (1:1000)                                    | Cell Signaling_#14269   | WB       |
| GAPDH (1:1000)                                 | Santa Cruz_sc-47724     | WB       |
| TIAR (1:300)                                   | Cell Signaling_#8509    | IF       |
| HA (1:200)                                     | Sigma aldrich_H6908     | IF       |
| IgG mouse                                      | Santa Cruz_sc-2025      | IP       |
| IgG rabbit                                     | Santa Cruz_sc-2027      | IP       |
| Goat anti-mouse IgG-HRP (1:10000)              | Santa Cruz_sc2005       | WB       |
| Goat anti-rabbit IgG-HRP (1:10000)             | Santa Cruz_sc2004       | WB       |
| VeriBlot for IP Detection Reagent-HRP (1:1000) | Abcam_ab131366          | WB       |
| Goat anti-rabbit AlexaFluor 488 (1:500)        | Thermo Fisher_#A-11034  | IF       |
| Goat anti-rabbit AlexaFluor 555 (1:500)        | Thermo Fisher_#A-21430  | IF       |
| Goat anti-mouse AlexaFluor 488 (1:500)         | Thermo Fisher_#A-11017  | IF       |
| Goat anti-mouse AlexaFluor 555 (1:500)         | Thermo Fisher_#A-21422  | IF       |

**Supplementary Table 2.** List of primers used for RT-PCR in splicing assays.

| <b>Gene</b>    | <b>Foward primer</b>      | <b>Reverse primer</b>        | <b>Ref</b>             |
|----------------|---------------------------|------------------------------|------------------------|
| <i>GAPDH</i>   | TCCCCACTGCCAACGTGTCAGTG   | ACCCTGTTGCTGTAGCCAAATTCG     | Colombrita et al, 2015 |
| <i>MADD</i>    | GACCTGAATTGGGTGGCGAGTTCCT | CATTGGTGTCTTGTA CTGTGGCTC    | De Conti et al, 2015   |
| <i>STAG2</i>   | GTATGTTTACTTGAAAAAGTTCATG | TGATTCATCCATAATTGAAGCTGGA    | De Conti et al, 2015   |
| <i>POLDIP3</i> | GCTTAATGCCAGACCGGGAGTTG   | TCA TCTTCATCCAGGTCATA TAAATT | Colombrita et al, 2015 |

**Supplementary Table 3.** Summary of statistical analyses.

DF, degree of freedom.

|                 | Number of experiments                                                                                                                                                              | Mean±SD                                                                                 | Statistical test; DF               | Post hoc test |
|-----------------|------------------------------------------------------------------------------------------------------------------------------------------------------------------------------------|-----------------------------------------------------------------------------------------|------------------------------------|---------------|
| <b>Figure 3</b> |                                                                                                                                                                                    |                                                                                         |                                    |               |
| 3A              | siCTRL: 3<br>siTDP-43: 3<br>siTDP-43+Flag-TDP-43 WT: 3<br>siTDP-43+Flag-TDP-43 K136R: 3                                                                                            | 8.43%±1.84%<br>3.23%±2.75%<br>63.98%±7.5%<br>27.50%±0.47%                               | one way-ANOVA;<br>DF: 11           | Tukey         |
| 3B              | siCTRL: 4<br>siTDP-43: 4<br>siTDP-43+Flag-TDP-43 WT: 4<br>siTDP-43+Flag-TDP-43 K136R: 4                                                                                            | 64.41%±6.97%<br>24.70%±10.01%<br>91.01%±3.08%<br>64.37%±5.15%                           | one way-ANOVA;<br>DF: 15           | Tukey         |
| 3C              | siCTRL: 3<br>siTDP-43: 3<br>siTDP-43+Flag-TDP-43 WT: 3<br>siTDP-43+Flag-TDP-43 K136R: 3                                                                                            | 3.65%±1.32%<br>2.34%±1.12%<br>12.47%±4.9%<br>2.26%±0.84%                                | one way-ANOVA;<br>DF: 11           | Tukey         |
| 3D              | siCTRL: 6<br>siTDP-43: 6<br>siTDP-43+Flag-TDP-43 WT: 6<br>siTDP-43+Flag-TDP-43 K136R: 6                                                                                            | 91.08%± 0.39%<br>89.67%±0.73%<br>93.88%±0.59%<br>93.77%±1.06%                           | one way-ANOVA;<br>DF: 23           | Tukey         |
| 3F              | siCTRL: 3<br>siTDP-43: 3<br>siTDP-43+Flag-TDP-43 WT: 3<br>siTDP-43+Flag-TDP-43 K136R: 3                                                                                            | 92.44%±5.09%<br>69.55%±3.08%<br>79.93%±0.9%<br>79.6%±2.89%                              | one way-ANOVA;<br>DF: 11           | Tukey         |
| 3G              | siCTRL: 3<br>siTDP-43: 3<br>siTDP-43+Flag-TDP-43 WT: 3<br>siTDP-43+Flag-TDP-43 K136R: 3                                                                                            | 81.73%±2.92%<br>63.52%±3.72%<br>74.13%±3.14%<br>65.74%±1.4%                             | one way-ANOVA;<br>DF: 11           | Tukey         |
| 3H              | siCTRL: 5<br>siTDP-43: 5<br>siTDP-43+Flag-TDP-43 WT: 5<br>siTDP-43+Flag-TDP-43 K136R: 5                                                                                            | 77.98%±5.32%<br>29.82%±5.05%<br>42.52%±4.6%<br>47.7%±10.32%                             | one way-ANOVA;<br>DF: 19           | Tukey         |
| <b>Figure 5</b> |                                                                                                                                                                                    |                                                                                         |                                    |               |
| 5B              | Flag-TDP-43 WT+YFP: 3<br>Flag-TDP-43 WT+YFP-SUMO-1: 3<br>Flag-TDP43 WT+YFP-SEN1: 3<br>Flag-TDP-43 K136R+YFP: 3<br>Flag-TDP-43 K136R+YFP-SUMO-1: 3<br>Flag-TDP-43 K136R+YFP-SEN1: 3 | 3.71%±0.93%<br>3.93%±0.97%<br>19.27%±2.77%<br>3.28%±0.59%<br>2.77%±0.74%<br>9.04%±0.74% | two way-ANOVA;<br>DF:29            | Bonferroni    |
| <b>Figure 6</b> |                                                                                                                                                                                    |                                                                                         |                                    |               |
| 6B_SUMO-1       | NT: 5<br>TS-1: 5                                                                                                                                                                   | 0.42±0.058                                                                              | Student's Unpaired t<br>Test; DF:6 | N/A           |
| 6B_TDP-43       | NT: 5<br>TS-1: 5                                                                                                                                                                   | 0.74±0.07                                                                               | Student's Unpaired t<br>Test; DF:6 | N/A           |
| 6D_SUMO-2       | NT: 4<br>TS-1: 4                                                                                                                                                                   | 21.65%±2.7%<br>37.25%±1.49%                                                             | Student's Unpaired t<br>Test; DF:6 | N/A           |
| 6D_TDP-43       | NT: 4<br>TS-1: 4                                                                                                                                                                   | 20%±1.25%<br>25.5%±0.64%                                                                | Student's Unpaired t<br>Test; DF:6 | N/A           |

|                               | Number of experiments                                                                        | Mean±SEM                                                                                   | Statistical test; DF                  | Post hoc test |
|-------------------------------|----------------------------------------------------------------------------------------------|--------------------------------------------------------------------------------------------|---------------------------------------|---------------|
| <b>Figure 7</b>               |                                                                                              |                                                                                            |                                       |               |
| 7B_SUMO-1                     | NT: 5<br>KCL 3': 5                                                                           | 1.41±0.15                                                                                  | Student's Unpaired t<br>Test; DF:4    | N/A           |
| 7B_TDP-43                     | NT: 5<br>KCL 3': 5                                                                           | 1.126±0.058                                                                                | Student's Unpaired t<br>Test; DF:8    | N/A           |
| 7D_SUMO-1                     | C_KCL 3': 5<br>N_KCL 3': 5                                                                   | 1.69±0.21<br>1.5±0.06                                                                      | two way-ANOVA;<br>DF:5                | Tukey         |
| 7E_TDP-43                     | C_KCL 3': 5<br>N_KCL 3': 5                                                                   | 2.6±0.161<br>1.34±0.074                                                                    | two way-ANOVA;<br>DF:5                | Tukey         |
| 7E_SUMO-TDP-43                | NT: 5<br>KCL 3': 5                                                                           | 1.56±0.065                                                                                 | Student's Unpaired t<br>Test; DF:6    | N/A           |
| 7G_TDP-43                     | NT: 4<br>KCL 3': 4                                                                           | 20%±1.22%<br>58.25%±4.25%                                                                  | Student's Unpaired t<br>Test; DF:6    | N/A           |
| 7G_SUMO-1                     | NT: 4<br>KCL 3': 4                                                                           | 21.75%±2.59%<br>55.5%±2.59%                                                                | Student's Unpaired t<br>Test; DF:6    | N/A           |
| <b>Figure 8</b>               |                                                                                              |                                                                                            |                                       |               |
| 8C                            | NT_N: 4<br>NT_N+C: 4<br>NT_AGG: 4<br>TS-1_N: 4<br>TS-1_N+C: 4<br>TS-1_AGG: 4                 | 74,9%±1.22%<br>16.01%±1.84%<br>9.09%±2.21%<br>67.7%±1.37%<br>24.37%±2.28%<br>7.94%±2.22%   | two way-ANOVA;<br>DF: 23              | Bonferroni    |
| 8D                            | NT_Diffuse: 3<br>NT_Puncta: 3<br>NT_AGG:3<br>TS-1_Diffuse:3<br>TS-1_Puncta: 3<br>TS-1_AGG: 3 | 44.21%±3.3%<br>25.05%±1.68%<br>30.73±1.64%<br>33.81%±2.05%<br>33.75%±2.54%<br>32.44%±0.96% | two way-ANOVA;<br>DF: 17              | Bonferroni    |
| 8E                            | NT_N: 4<br>NT_C: 4<br>TS-1_N: 4<br>TS-1_C: 4                                                 | 35.89%±1.97%<br>64.12%±1.97%<br>32.85%±2.55%<br>67.16%±2.55%                               | two way-ANOVA;<br>DF: 12              | Bonferroni    |
| 8F_Aggregates                 | NT: 4<br>TS-1: 4                                                                             | 26.56±1.4<br>26.36±1.47                                                                    | Student's Unpaired t<br>Test; DF: 364 | N/A           |
| 8F_AGG Distribution           | NT vs TS-1:<br><0.20 µm: 4<br>[0.2-0.5 µm]: 4<br>[0.5-1 µm]: 4<br>>1.0 µm: 4                 | NT vs TS-1:<br>63 vs 63<br>23 vs 22<br>9 vs 9<br>5 vs 5                                    | Chi-square;<br>DF:3                   | N/A           |
| 8H_Aggregates                 | NT: 4<br>TS-1: 4                                                                             | 26.13±1.78<br>21.63±2.13                                                                   | Student's Unpaired t<br>Test; DF: 110 | N/A           |
| 8H_AGG Distribution           | NT vs TS-1:<br><0.20 µm: 4<br>[0.2-0.5 µm]: 4<br>[0.5-1 µm]: 4<br>>1.0 µm: 4                 | NT vs TS-1:<br>71 vs 73<br>20 vs 21<br>7 vs 5<br>2 vs 1                                    | Chi-square;<br>DF:3                   | N/A           |
| <b>Supplementary Figure 4</b> |                                                                                              |                                                                                            |                                       |               |
| 4E                            | YFP: 4<br>YFP-SUMO-1: 4<br>YFP-SEN1: 4                                                       | 16.4%±4.2%<br>7.53%±0.47%<br>19.9%±4.29%                                                   | one way-ANOVA;<br>DF:11               | Tukey         |
| 4F                            | YFP: 3<br>YFP-SUMO-1: 3<br>YFP-SEN1: 3                                                       | 100%±0%<br>100%±0%<br>100%±0%                                                              | N/A                                   | N/A           |
